# Supplementary material
Source: PubMed Central journal article supplement (PMC6035062)
Supplement: NIHMS957397-supplement-supplement_1.pdf [file NIHMS957397-supplement-supplement_1.pdf]

Supplemental Table 1. Body mass index and risk of diverticulitis stratified by age, smoking status, and physical activity (2008-2014)\*

|                    | No. of cases | Body mass index (kg/m <sup>2</sup> ) |                   |                   |                   |                   |                   | P for interaction |
|--------------------|--------------|--------------------------------------|-------------------|-------------------|-------------------|-------------------|-------------------|-------------------|
|                    |              | <22.5                                | 22.5-24.9         | 25.0-27.4         | 27.5-29.9         | 30.0-34.9         | ≥35.0             |                   |
| Age                |              |                                      |                   |                   |                   |                   |                   | 0.58              |
| Age <70 years      | 338          | 1 (ref)                              | 1.28 (0.86, 1.89) | 1.24 (0.83, 1.84) | 1.43 (0.94, 2.16) | 1.74 (1.18, 2.57) | 1.63 (1.04, 2.57) |                   |
| Age ≥70 years      | 746          | 1 (ref)                              | 1.00 (0.80, 1.26) | 1.35 (1.09, 1.68) | 1.33 (1.04, 1.71) | 1.40 (1.09, 1.79) | 1.31 (0.93, 1.85) |                   |
| Smoking status     |              |                                      |                   |                   |                   |                   |                   | 0.16              |
| Never              | 468          | 1 (ref)                              | 0.96 (0.72, 1.28) | 1.15 (0.87, 1.53) | 1.33 (0.98, 1.82) | 1.19 (0.87, 1.64) | 1.31 (0.87, 1.96) |                   |
| Ever               | 608          | 1 (ref)                              | 1.19 (0.91, 1.55) | 1.47 (1.14, 1.91) | 1.41 (1.05, 1.89) | 1.85 (1.40, 2.43) | 1.49 (1.04, 2.13) |                   |
| Physical activity† |              |                                      |                   |                   |                   |                   |                   | 0.62              |
| <12 MET-h/week     | 513          | 1 (ref)                              | 0.98 (0.71, 1.34) | 1.28 (0.96, 1.72) | 1.43 (1.05, 1.96) | 1.41 (1.04, 1.91) | 1.42 (0.99, 2.04) |                   |
| ≥12 MET-h/week     | 477          | 1 (ref)                              | 1.10 (0.84, 1.43) | 1.30 (1.00, 1.70) | 1.22 (0.88, 1.69) | 1.46 (1.07, 2.01) | 1.15 (0.69, 1.92) |                   |

\* Body mass index was updated every 2 years from 2008 to 2012. Models were adjusted for menopausal status and menopausal hormone use, vigorous activity, alcohol intake, smoking, aspirin use, other nonsteroidal anti-inflammatory drug use, multivitamin use, acetaminophen use, physical examination, hypertension, hypercholesterolemia, calorie intake, dietary fiber intake, and red meat intake.

† Dichotomized according to median level of physical activity.

Supplemental Table 2. Body mass index and risk of diverticulitis using follow-up from 1990 to 2014\*

|                    | BMI (kg/m <sup>2</sup> ) |                   |                   |                   |                   |                   | P for trend |
|--------------------|--------------------------|-------------------|-------------------|-------------------|-------------------|-------------------|-------------|
|                    | <22.5                    | 22.5-24.9         | 25.0-27.4         | 27.5-29.9         | 30.0-34.9         | ≥35.0             |             |
| No. of cases       | 942                      | 1107              | 1194              | 765               | 908               | 461               |             |
| Person-years       | 314910                   | 317389            | 289433            | 179012            | 197472            | 93417             |             |
| Age                | 1 (ref)                  | 1.18 (1.08, 1.29) | 1.38 (1.27, 1.51) | 1.42 (1.29, 1.56) | 1.54 (1.41, 1.69) | 1.69 (1.51, 1.89) | <0.001      |
| Multivariate†      | 1 (ref)                  | 1.15 (1.06, 1.26) | 1.33 (1.22, 1.45) | 1.34 (1.22, 1.48) | 1.45 (1.32, 1.60) | 1.59 (1.41, 1.79) | <0.001      |
| Multivariate+diet‡ | 1 (ref)                  | 1.15 (1.05, 1.26) | 1.32 (1.21, 1.44) | 1.34 (1.22, 1.48) | 1.45 (1.32, 1.60) | 1.58 (1.41, 1.78) | <0.001      |

\* Body mass index as updated every 2 years from 1990 to 2012.

† Adjusted for menopausal status and menopausal hormone use, vigorous activity, alcohol intake, smoking, aspirin use, other NSAID use, multivitamin use, acetaminophen use, physical examination, hypertension, hypercholesterolemia, and calorie intake.

‡ Further adjusted for dietary intake of fiber and red meat.

Supplemental Table 3. Waist circumference, waist-to-hip ratio and risk of diverticulitis using follow-up from 1990 to 2014\*

|                                 | Q1      | Q2                | Q3                | Q4                | Q5                | P for trend |
|---------------------------------|---------|-------------------|-------------------|-------------------|-------------------|-------------|
| Waist circumference (quintiles) |         |                   |                   |                   |                   |             |
| No. of cases                    | 531     | 752               | 935               | 849               | 1065              |             |
| Person-years                    | 195964  | 211301            | 220415            | 181467            | 211707            |             |
| Age                             | 1 (ref) | 1.22 (1.09, 1.37) | 1.39 (1.25, 1.55) | 1.48 (1.33, 1.66) | 1.57 (1.41, 1.75) | <0.001      |
| Multivariate†                   | 1 (ref) | 1.21 (1.08, 1.35) | 1.36 (1.21, 1.51) | 1.43 (1.28, 1.60) | 1.50 (1.34, 1.68) | <0.001      |
| Multivariate+diet‡              | 1 (ref) | 1.21 (1.08, 1.35) | 1.35 (1.21, 1.50) | 1.42 (1.26, 1.59) | 1.49 (1.33, 1.66) | <0.001      |
| Multivariate+diet+BMI           | 1 (ref) | 1.16 (1.03, 1.30) | 1.24 (1.10, 1.39) | 1.26 (1.11, 1.43) | 1.26 (1.10, 1.44) | <0.001      |
| Waist-to-hip ratio (quintiles)  |         |                   |                   |                   |                   |             |
| No. of cases                    | 589     | 715               | 897               | 915               | 1005              |             |
| Person-years                    | 203221  | 203512            | 202935            | 203698            | 203711            |             |
| Age                             | 1 (ref) | 1.14 (1.02, 1.27) | 1.37 (1.23, 1.52) | 1.34 (1.21, 1.49) | 1.43 (1.29, 1.59) | <0.001      |
| Multivariate†                   | 1 (ref) | 1.11 (1.00, 1.24) | 1.32 (1.19, 1.47) | 1.27 (1.14, 1.41) | 1.34 (1.20, 1.49) | <0.001      |
| Multivariate+diet‡              | 1 (ref) | 1.11 (0.99, 1.24) | 1.31 (1.18, 1.46) | 1.26 (1.13, 1.40) | 1.33 (1.19, 1.48) | <0.001      |
| Multivariate+diet+BMI           | 1 (ref) | 1.08 (0.97, 1.21) | 1.25 (1.13, 1.39) | 1.18 (1.06, 1.31) | 1.23 (1.10, 1.37) | <0.001      |

\* Waist circumference and waist-to-hip ratio were assessed in 1986, 1996, and 2000. We updated and used the most recent information prior to the questionnaire cycle of interest.

† Adjusted for height, menopausal status and menopausal hormone use, vigorous activity, alcohol intake, smoking, aspirin use, other nonsteroidal anti-inflammatory drug use, multivitamin use, acetaminophen use, physical examination, hypertension, hypercholesterolemia, and calorie intake.

‡ Further adjusted for dietary intake of fiber and red meat.

Supplemental Table 4. Weight change from age 18 to current and risk of diverticulitis stratified by various characteristics (2008-2014)\*

|                                | No. of cases | Weight change (kg) |                      |                   |                   |                   |                   | P for interaction |
|--------------------------------|--------------|--------------------|----------------------|-------------------|-------------------|-------------------|-------------------|-------------------|
|                                |              | Loss $\geq 2.0$    | Loss or gain $< 2.0$ | Gain 2.0-5.9      | Gain 6.0-9.9      | Gain 10.0-19.9    | Gain $\geq 20.0$  |                   |
| Age                            |              |                    |                      |                   |                   |                   |                   | 0.50              |
| Age $< 70$ years               | 290          | 1.00 (0.42, 2.36)  | 1 (ref)              | 1.03 (0.49, 2.18) | 1.62 (0.82, 3.17) | 1.53 (0.81, 2.87) | 1.78 (0.95, 3.35) |                   |
| Age $\geq 70$ years            | 651          | 0.88 (0.57, 1.36)  | 1 (ref)              | 1.50 (1.02, 2.21) | 1.18 (0.80, 1.75) | 1.64 (1.16, 2.33) | 1.70 (1.19, 2.43) |                   |
| BMI age 18 years               |              |                    |                      |                   |                   |                   |                   | 0.12              |
| $< 21$ kg/m <sup>2</sup>       | 510          | 1.10 (0.58, 2.09)  | 1 (ref)              | 1.60 (0.98, 2.62) | 1.40 (0.86, 2.26) | 1.48 (0.95, 2.32) | 1.66 (1.05, 2.61) |                   |
| $\geq 21$ kg/m <sup>2</sup>    | 431          | 0.81 (0.50, 1.33)  | 1 (ref)              | 1.14 (0.70, 1.87) | 1.17 (0.72, 1.90) | 1.81 (1.19, 2.75) | 1.86 (1.22, 2.84) |                   |
| Smoking status                 |              |                    |                      |                   |                   |                   |                   | 0.09              |
| Never                          | 404          | 1.05 (0.58, 1.90)  | 1 (ref)              | 1.65 (0.99, 2.75) | 1.44 (0.86, 2.39) | 1.64 (1.03, 2.62) | 1.68 (1.04, 2.70) |                   |
| Ever                           | 531          | 0.88 (0.52, 1.48)  | 1 (ref)              | 1.27 (0.79, 2.05) | 1.28 (0.81, 2.04) | 1.69 (1.11, 2.56) | 1.87 (1.23, 2.85) |                   |
| Physical activity <sup>†</sup> |              |                    |                      |                   |                   |                   |                   | 0.72              |
| $< 12$ MET-h/week              | 454          | 0.88 (0.50, 1.57)  | 1 (ref)              | 1.26 (0.74, 2.13) | 1.17 (0.70, 1.96) | 1.38 (0.87, 2.19) | 1.50 (0.95, 2.39) |                   |
| $\geq 12$ MET-h/week           | 420          | 0.98 (0.58, 1.68)  | 1 (ref)              | 1.48 (0.93, 2.36) | 1.30 (0.82, 2.08) | 1.62 (1.06, 2.48) | 1.71 (1.10, 2.66) |                   |

\* Weight change from age 18 to current was calculated by subtracting weight at age 18 from updated weight in current questionnaire cycle. Models were adjusted for age, weight at age 18, height, menopausal status and menopausal hormone use, vigorous activity, alcohol intake, smoking, aspirin use, other nonsteroidal anti-inflammatory drug use, multivitamin use, acetaminophen use, physical examination, hypertension, hypercholesterolemia, calorie intake, dietary fiber intake, and red meat intake.

<sup>†</sup> Dichotomized according to median level of physical activity.

Supplemental Table 5. 4-year weight change during follow-up and risk of diverticulitis (2008-2014)\*

| Weight change (kg) | Median (kg) | No. of cases | Person-years | Model 1†          | Model 2‡          |
|--------------------|-------------|--------------|--------------|-------------------|-------------------|
| Loss $\geq$ 5.0    | -8.2        | 126          | 30911        | 0.86 (0.70, 1.07) | 0.85 (0.68, 1.05) |
| Loss 4.9-1.0       | -2.7        | 271          | 60844        | 1.02 (0.86, 1.20) | 1.01 (0.86, 1.20) |
| Loss or gain <1.0  | 0           | 300          | 69363        | 1 (ref)           | 1 (ref)           |
| Gain 1.0-4.9       | 2.3         | 240          | 54838        | 1.03 (0.86, 1.22) | 1.02 (0.86, 1.21) |
| Gain $\geq$ 5.0    | 7.7         | 90           | 19562        | 1.06 (0.84, 1.35) | 1.04 (0.82, 1.32) |
| P for trend        |             |              |              | 0.14              | 0.14              |

\* 4-year weight change during follow-up was calculated and updated using repeated weight assessments 4 years apart. We suspended updating weight change information when a participant quit smoking or reported a diagnosis of cancer, cardiovascular disease, or inflammatory bowel disease in the past 2 years. Results were essentially unchanged if we did not suspend updating.

† Model 1 was adjusted for age, body weight at the start of each time period, and height.

‡ Model 2 was further adjusted for menopausal status and menopausal hormone use, vigorous activity, alcohol intake, smoking, aspirin use, other NSAID use, multivitamin use, acetaminophen use, physical examination, hypertension, hypercholesterolemia, calorie intake, fiber intake, and red meat intake.

Supplemental Table 6. 4-year weight change during follow-up and risk of diverticulitis stratified by body mass index (2008-2014)\*

| Weight change (kg) | Median (kg) | BMI <25 kg/m <sup>2</sup> |                   | BMI ≥25 kg/m <sup>2</sup> |                   |
|--------------------|-------------|---------------------------|-------------------|---------------------------|-------------------|
|                    |             | No. of cases              | HR (95% CI)       | No. of cases              | HR (95% CI)       |
| Loss ≥5.0          | -8.2        | 18                        | 0.73 (0.44, 1.20) | 108                       | 0.85 (0.66, 1.08) |
| Loss 4.9-1.0       | -2.7        | 111                       | 1.17 (0.91, 1.51) | 160                       | 0.92 (0.74, 1.14) |
| Loss or gain <1.0  | 0           | 131                       | 1 (ref)           | 169                       | 1 (ref)           |
| Gain 1.0-4.9       | 2.3         | 95                        | 1.10 (0.84, 1.44) | 145                       | 0.95 (0.76, 1.19) |
| Gain ≥5.0          | 7.7         | 24                        | 1.15 (0.74, 1.78) | 66                        | 0.97 (0.73, 1.29) |
| P for trend        |             |                           | 0.36              |                           | 0.27              |
| P for interaction  |             |                           |                   | 0.95                      |                   |

\* 4-year weight change during follow-up was calculated and updated using repeated weight assessments 4 years apart. We suspended updating weight change information when a participant quit smoking or reported a diagnosis of cancer, cardiovascular disease, or inflammatory bowel disease in the past 2 years. Models were adjusted for age, height, menopausal status and menopausal hormone use, vigorous activity, alcohol intake, smoking, aspirin use, other NSAID use, multivitamin use, acetaminophen use, physical examination, hypertension, hypercholesterolemia, calorie intake, fiber intake, and red meat intake.

Supplemental Table 7. Body mass index and risk of recurrent and non-recurrent diverticulitis (2008-2014)\*

|                                     | BMI (kg/m <sup>2</sup> ) |                   |                   |                   |                   | P for trend |
|-------------------------------------|--------------------------|-------------------|-------------------|-------------------|-------------------|-------------|
|                                     | <22.5                    | 22.5-24.9         | 25.0-27.4         | 27.5-29.9         | ≥30.0             |             |
| <b>Recurrent diverticulitis</b>     |                          |                   |                   |                   |                   |             |
| No. of cases                        | 41                       | 37                | 53                | 42                | 67                |             |
| Age                                 | 1 (ref)                  | 0.94 (0.60, 1.47) | 1.37 (0.91, 2.06) | 1.67 (1.08, 2.57) | 1.58 (1.07, 2.35) | 0.003       |
| Multivariate†                       | 1 (ref)                  | 0.94 (0.60, 1.47) | 1.36 (0.90, 2.06) | 1.67 (1.08, 2.60) | 1.62 (1.07, 2.44) | 0.003       |
| Multivariate+diet‡                  | 1 (ref)                  | 0.95 (0.60, 1.48) | 1.38 (0.91, 2.10) | 1.71 (1.10, 2.66) | 1.66 (1.09, 2.51) | 0.002       |
| <b>Non-recurrent diverticulitis</b> |                          |                   |                   |                   |                   |             |
| No. of cases                        | 166                      | 162               | 186               | 117               | 215               |             |
| Age                                 | 1 (ref)                  | 1.12 (0.90, 1.40) | 1.34 (1.09, 1.65) | 1.31 (1.03, 1.66) | 1.49 (1.22, 1.84) | <0.001      |
| Multivariate†                       | 1 (ref)                  | 1.11 (0.89, 1.38) | 1.31 (1.06, 1.62) | 1.28 (1.00, 1.63) | 1.47 (1.18, 1.82) | <0.001      |
| Multivariate+diet‡                  | 1 (ref)                  | 1.10 (0.89, 1.37) | 1.30 (1.05, 1.61) | 1.26 (0.99, 1.61) | 1.44 (1.16, 1.79) | <0.001      |

\* Body mass index was updated every 2 years from 2008 to 2012.

† Adjusted for menopausal status and menopausal hormone use, vigorous activity, alcohol intake, smoking, aspirin use, other NSAID use, multivitamin use, acetaminophen use, physical examination, hypertension, hypercholesterolemia, and calorie intake.

‡ Further adjusted for dietary intake of fiber and red meat.

Supplemental Table 8. Body mass index and risk of surgery for diverticulitis (1992-2014)\*

|                    | BMI (kg/m <sup>2</sup> ) |                   |                   |                   |                   |                   | P for trend |
|--------------------|--------------------------|-------------------|-------------------|-------------------|-------------------|-------------------|-------------|
|                    | <22.5                    | 22.5-24.9         | 25.0-27.4         | 27.5-29.9         | 30.0-34.9         | ≥35.0             |             |
| No. of cases       | 90                       | 107               | 139               | 86                | 95                | 42                |             |
| Person-years       | 285971                   | 292088            | 272705            | 171239            | 190502            | 90852             |             |
| Age                | 1 (ref)                  | 1.21 (0.92, 1.61) | 1.67 (1.28, 2.18) | 1.60 (1.19, 2.16) | 1.61 (1.20, 2.15) | 1.47 (1.02, 2.13) | 0.002       |
| Multivariate†      | 1 (ref)                  | 1.23 (0.93, 1.63) | 1.71 (1.30, 2.23) | 1.65 (1.22, 2.24) | 1.67 (1.24, 2.26) | 1.56 (1.06, 2.30) | 0.001       |
| Multivariate+diet‡ | 1 (ref)                  | 1.23 (0.93, 1.63) | 1.71 (1.30, 2.24) | 1.65 (1.22, 2.24) | 1.67 (1.24, 2.26) | 1.56 (1.06, 2.30) | 0.002       |

\* In 2012 and 2014 questionnaires, participants were asked if they had surgery for diverticulitis which dated back to 1992. Body mass index was updated every 2 years from 1992 to 2012.

† Adjusted for menopausal status and menopausal hormone use, vigorous activity, alcohol intake, smoking, aspirin use, other NSAID use, multivitamin use, acetaminophen use, physical examination, hypertension, hypercholesterolemia, and calorie intake.

‡ Further adjusted for dietary intake of fiber and red meat.
